# Supplementary material
Source: MDPI journal article supplement (https://www.mdpi.com/2073-4344/10/9/1096)
Supplement: s1 [file s1]

Supplementary Materials

Hydrogenative cyclization of levulinic acid to γ-valerolactone with methanol and Ni-Fe bimetallic catalysts

Ligang Luo 1,*,†, Xiao Han 1,† and Qin Zeng 1,2

1 College of Life Science, Shanghai Normal University, 100 Guilin Rd, Shanghai 200241, China; wo.lixiang0530@163.com (X.H.); zengqllg@usst.edu.cn (Q.Z.)

2 The Public Experiment Center, University of Shanghai for Science and Technology, Shanghai 200093, China

***** Correspondence: ligangluo@shnu.edu.cn

†  Ligang Luo and Xiao Han Contributed equally to this work.

Received: 26 August 2020; Accepted: 14 September 2020; Published: date


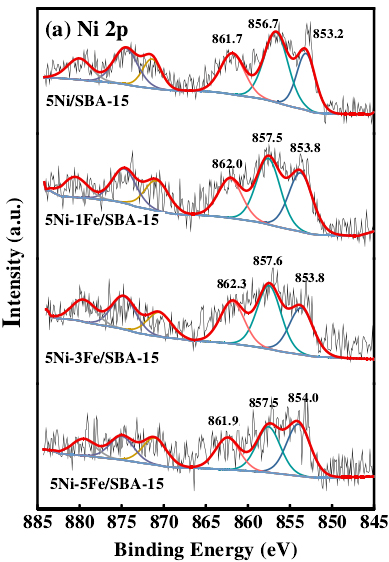

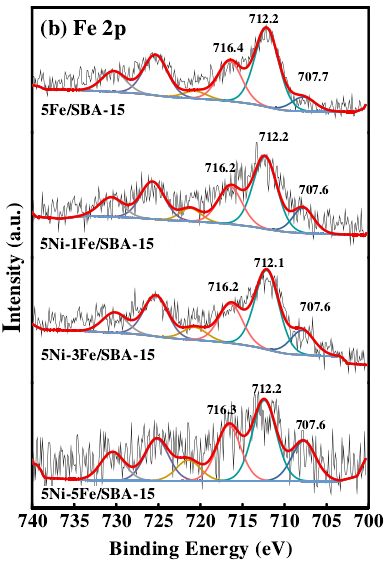


**Figure S1** XPS profiles of reduced catalysts: (**a**) Ni 2p spectra of Ni/SBA-15, 5Ni-1Fe/SBA-15 5Ni-3Fe/SBA-15 and 5Ni-5Fe/SBA-15, and (**b**) Fe 2p spectra of Fe/SBA-15, 5Ni-1Fe/SBA-15, 5Ni-3Fe/SBA-15 and 5Ni-5Fe/SBA-15.


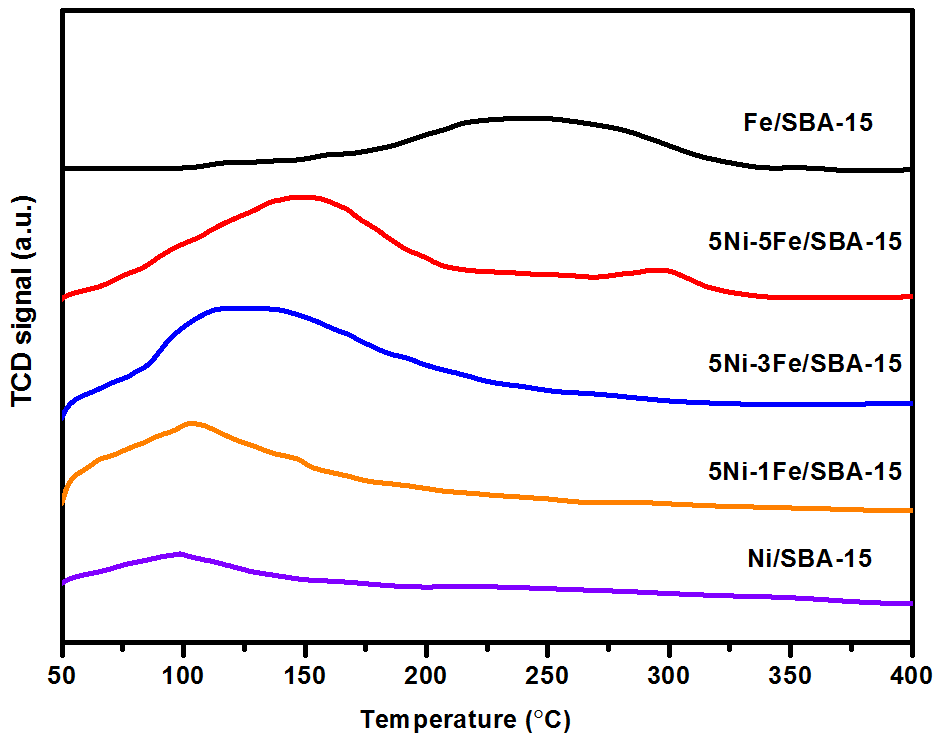


**Figure S2** H2-TPD profiles of the synthetized SBA-15 supported catalysts.


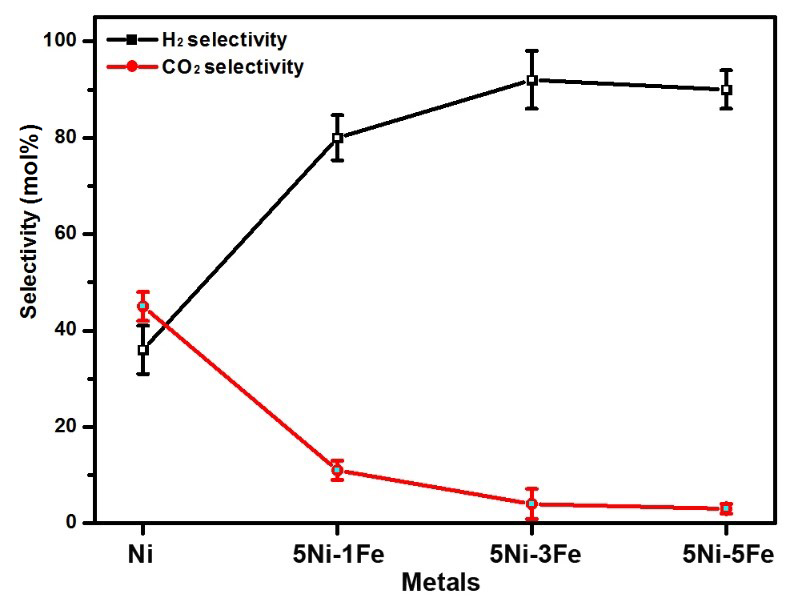


**Figure S3** The influence of metals supported with SBA-15 on the amount of hydrogen in gas (reaction conditions: 2 g LA, 0.5g catalyst, 15 ml methanol).


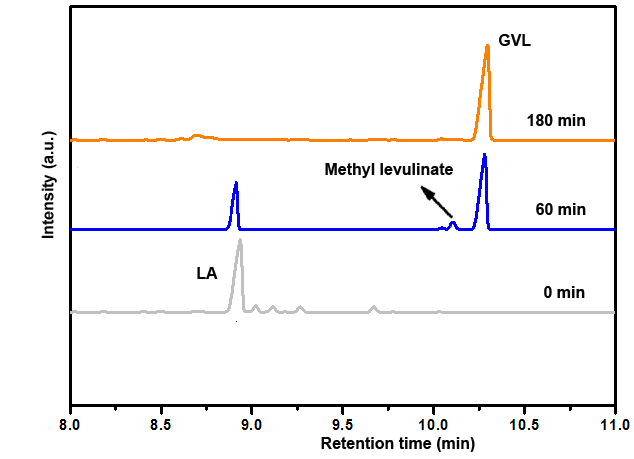


**Figure S4** GC-MS results for hydrogenation of levulinic acid with different reaction time (0-180 min) (condition: 2g LA, 0.5g 5Ni-3Fe/SBA-15, 15ml methanol).
